# Supplementary material for: Further crystal structures for the substituted aspirin family of molecules: the first aspirin carboxylate catemer and a detailed assessment of the subtle influences of weak intermolecular interactions
Source: Royal Society of Chemistry journal article supplement (doi:10.1039/c0ce00838a), 2011-01-01
Supplement: c0ce00838a.pdf [file c0ce00838a.pdf]

## Further Relationships and Associations in the Crystal Structures of a Family of Substituted Aspirin Molecules

Michael B Hursthouse\*, Riccardo Montis and Graham J Tizzard

School of Chemistry, University of Southampton, Southampton SO17 1BJ, UK

### Electronic Supplementary Information

#### Synthesis and crystallisation of functionalized 2-acetoxybenzoic acids.

The functionalized salicylic acid (10.8 mmol) was mixed with acetic anhydride (2mL, 21 mmol) and 1 drop of 85% phosphoric acid solution. The mixture was stirred under reflux for 2 hours at 80° C whereupon water (2 mL) was added. The reaction continued for 5 minutes and the mixture was cooled with an ice water bath. The precipitate formed was filtered off and washed with water.

#### XPac: Supramolecular Constructs and Translational Vectors.

| SC                   | D | Description                                   | #  | Base      | Dependencies   |
|----------------------|---|-----------------------------------------------|----|-----------|----------------|
| A1                   | 0 | Carboxylic acid dimer                         | 14 | -         | -              |
| B1                   | 0 | CarboxylicO...5sub dimer                      | 4  | -         | -              |
| C1                   | 0 | Acetyl-Acetyl dimer                           | 9  | -         | -              |
| C2                   | 1 | Row of Acetyl-Acetyl dimers > translation     | 3  | <i>t1</i> | C1 → C2        |
| E1                   | 1 | Row of single molecules > translation         | 3  | <i>t2</i> | COSP (CP) → E1 |
| D1                   | 1 | Stack of single molecules > translation       | 11 | <i>t3</i> | COSP (CP) → D1 |
| AB1                  | 1 | Tape- chain of A1 and B1 dimers > translation | 4  | <i>t4</i> | A1, B1 → AB1   |
| A8                   | 1 | Sheet-A1 dimer stacks > translation           | 2  | <i>t5</i> | A1 → A8        |
| <b>Isostructural</b> |   | 4MeO, 4F                                      |    |           |                |

Table S1: Supramolecular Construct descriptions. SC = Supramolecular Construct; D = dimensionality; Description, '>' = is related by; # = Number of structures in which construct occurs; Base = base vector of SC (see Table 2); Dependencies show lower dimensionality SCs present in given SC.

| Structures        | <i>t1</i> | d1    | <i>t2</i> | d2    | <i>t3</i> | d3    | <i>t4</i> | d4     | <i>t5</i> | d5    |
|-------------------|-----------|-------|-----------|-------|-----------|-------|-----------|--------|-----------|-------|
| 3-MeO             | -         | -     | -         | -     | -         | -     | -         | -      | 001       | 7.381 |
| 4-MeO             | -         | -     | -         | -     | 100       | 5.069 | -         | -      | -         | -     |
| 5-MeO             | -         | -     | -         | -     | -         | -     | -10-1     | 11.563 | -         | -     |
| 4-F               | -         | -     | -         | -     | 100       | 4.908 | -         | -      | -         | -     |
| 6-F               | 010       | 7.095 | 010       | 7.095 | -         | -     | -         | -      | -         | -     |
| 4-CF <sub>3</sub> | -         | -     | -         | -     | 1-10      | 5.752 | -         | -      | -         | -     |
| 5-Cl              | -         | -     | -         | -     | -         | -     | 100       | 10.086 | -         | -     |
| 5-Br              | -         | -     | -         | -     | -         | -     | 100       | 10.391 | -         | -     |
| 5-I               | -         | -     | -         | -     | -         | -     | -100      | 10.784 | -         | -     |
| 6-Me              | -         | -     | -         | -     | -         | -     | -         | -      | 010       | 7.238 |
| Asp 1             | 0-10      | 6.552 | 0-10      | 6.552 | -         | -     | -         | -      | -         | -     |
| Asp 2             | -         | -     | 0-10      | 6.506 | -         | -     | -         | -      | -         | -     |

Table S2: Translational vectors with lengths (Å). Grey colour is used to indicate structures involved in the previous paper.
